# Supplementary material
Source: publisher figshare collection journal article supplement (https://acs.figshare.com/ndownloader/files/4916422)
Supplement: Supplementary file 1 [file 4916422]

**Iodine and Chlorine Element Evolution in  
CH<sub>3</sub>NH<sub>3</sub>PbI<sub>3-x</sub>Cl<sub>x</sub> Thin Films for  
Highly Efficient Planar Heterojunction Perovskite Solar Cells**

Chenghao Cao <sup>†,‡</sup>, Chujun Zhang <sup>‡</sup>, Junliang Yang <sup>\*,‡,§</sup>, Jia Sun <sup>‡</sup>, Shuping Pang <sup>||</sup>, Han Wu <sup>‡</sup>,  
Runsheng Wu <sup>‡</sup>, Yongli Gao <sup>‡, ⊥</sup>, Chengbin Liu <sup>\*,†</sup>

<sup>†</sup> State Key Laboratory of Chemo/Biosensing and Chemometrics, Hunan University,  
Changsha 410082, Hunan, China

<sup>‡</sup> Hunan Key Laboratory for Super-microstructure and Ultrafast Process, School of Physics  
and Electronics, Central South University, Changsha 410083, Hunan, China

<sup>§</sup> Institute for Materials Microstructure, Central South University, Changsha, Hunan 410083,  
China

<sup>||</sup> Qingdao Institute of Bioenergy and Bioprocess Technology, Chinese Academy of Sciences,  
Qingdao 266101, China

<sup>⊥</sup> Department of Physics and Astronomy, University of Rochester, Rochester, NY 14627,  
USA

\* Corresponding authors: [junliang.yang@csu.edu.cn](mailto:junliang.yang@csu.edu.cn) (J. L. Yang), Tel.: +86-731-88660256

[chem\\_cblu@hnu.edu.cn](mailto:chem_cblu@hnu.edu.cn) (C. B. Liu), Tel.: +86-731-88823805

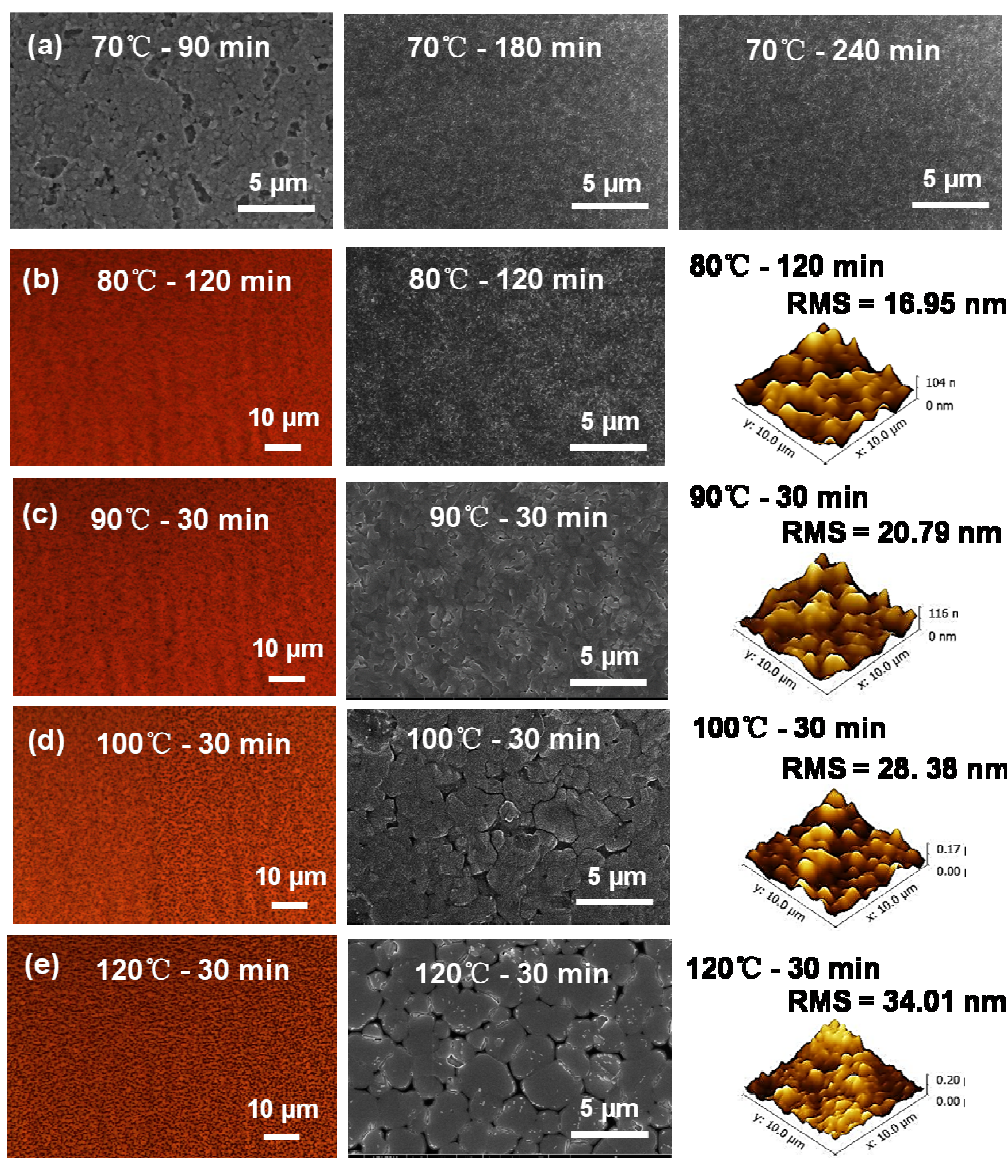

**Figure S1.** The typical morphologies of  $\text{CH}_3\text{NH}_3\text{PbI}_{3-x}\text{Cl}_x$  thin films under different annealing conditions. (a) SEM images of  $\text{CH}_3\text{NH}_3\text{PbI}_{3-x}\text{Cl}_x$  thin films treated at 70 °C for 90 min, 180 min and 240 min, respectively. Optical Microscopy, SEM and AFM images of  $\text{CH}_3\text{NH}_3\text{PbI}_{3-x}\text{Cl}_x$  thin films treated at (b) 80 °C for 120 min, (c) 90 °C for 30 min, (d) 100 °C for 30 min, and (e) 120 °C for 30 min. It could be seen that those  $\text{CH}_3\text{NH}_3\text{PbI}_{3-x}\text{Cl}_x$  thin films treated at higher temperature showed an obvious increase in the roughness. Although it could get a relatively smooth film at the lower temperature of 70 °C annealed for 3 hrs, it would spent too much time to carry out the whole experiment processes. Therefore, the annealing temperature was finally optimized at 80 °C.

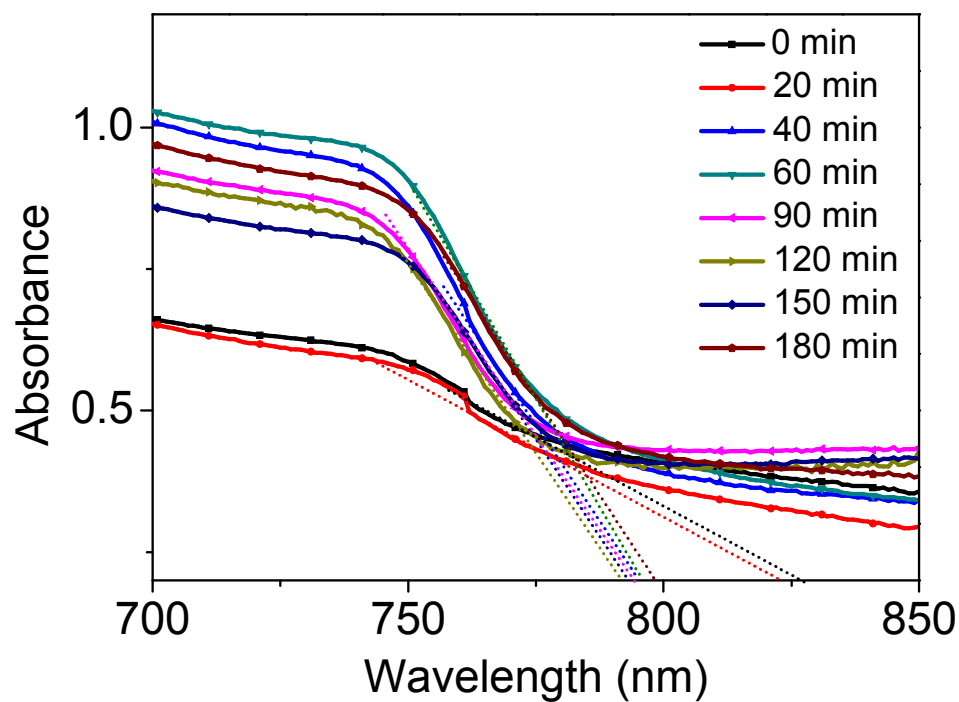

**Figure S2.** The magnified patterns for the absorption edge. It is found that  $\text{CH}_3\text{NH}_3\text{PbI}_{3-x}\text{Cl}_x$  thin film show indistinct absorbance edge when the annealing time is less than 60 min, probably resulting from the impurities in thin films while the perovskite crystal is not formed completely. For  $\text{CH}_3\text{NH}_3\text{PbI}_{3-x}\text{Cl}_x$  thin films prepared under longer annealing time, the obvious onsets of absorbance spectrum appear at around 795 nm, showing an intrinsic bandgap of about 1.55 eV.

**Table S1.** The photovoltaic parameters of the representative PHJ-PSC devices obtained from  $J$ - $V$  measurements with different annealing time.

| <b>Annealing Time</b><br><b>(min)</b> | <b><math>V_{oc}</math></b><br><b>(V)</b> | <b><math>J_{sc}</math></b><br><b>(mA/cm<sup>2</sup>)</b> | <b><math>FF</math></b><br><b>(%)</b> | <b><math>PCE</math></b><br><b>(%)</b> |
|---------------------------------------|------------------------------------------|----------------------------------------------------------|--------------------------------------|---------------------------------------|
| 20                                    | 0.97                                     | 3.38                                                     | 48.3                                 | 1.59                                  |
| 40                                    | 0.98                                     | 11.91                                                    | 49.7                                 | 5.82                                  |
| 60                                    | 0.98                                     | 17.09                                                    | 61.1                                 | 10.20                                 |
| 90                                    | 0.98                                     | 19.49                                                    | 66.6                                 | 12.70                                 |
| 120                                   | 0.97                                     | 22.49                                                    | 63.1                                 | 13.81                                 |
| 150                                   | 0.80                                     | 21.43                                                    | 52.9                                 | 9.12                                  |
| 180                                   | 0.72                                     | 18.65                                                    | 41.5                                 | 5.55                                  |

**Table S2.** The average values of photovoltaic parameters obtained from  $J$ - $V$  measurements for PHJ-PSCs with different thicknesses of C<sub>60</sub> layer annealed at 80 °C for 120 min. The best  $PCE$ s are shown in brackets.

| <b>Thickness of C<sub>60</sub></b><br><b>(nm)</b> | <b><math>V_{oc}</math></b><br><b>(V)</b> | <b><math>J_{sc}</math></b><br><b>(mA/cm<sup>2</sup>)</b> | <b><math>FF</math></b><br><b>(%)</b> | <b><math>PCE</math></b><br><b>(%)</b> |
|---------------------------------------------------|------------------------------------------|----------------------------------------------------------|--------------------------------------|---------------------------------------|
| 10                                                | 0.96 ± 0.01                              | 18.04 ± 1.73                                             | 48.11 ± 2.97                         | 8.32 ± 0.85<br>(9.54)                 |
| 15                                                | 0.94 ± 0.03                              | 21.48 ± 1.14                                             | 56.26 ± 2.47                         | 11.29 ± 0.44<br>(12.22)               |
| 20                                                | 0.96 ± 0.02                              | 21.92 ± 1.04                                             | 61.68 ± 4.49                         | 13.03 ± 0.53<br>(14.03)               |
| 25                                                | 0.94 ± 0.01                              | 21.71 ± 0.93                                             | 54.87 ± 1.68                         | 11.35 ± 0.49<br>(11.85)               |
| 30                                                | 0.94 ± 0.02                              | 19.68 ± 0.51                                             | 51.10 ± 3.07                         | 9.50 ± 0.51<br>(10.25)                |

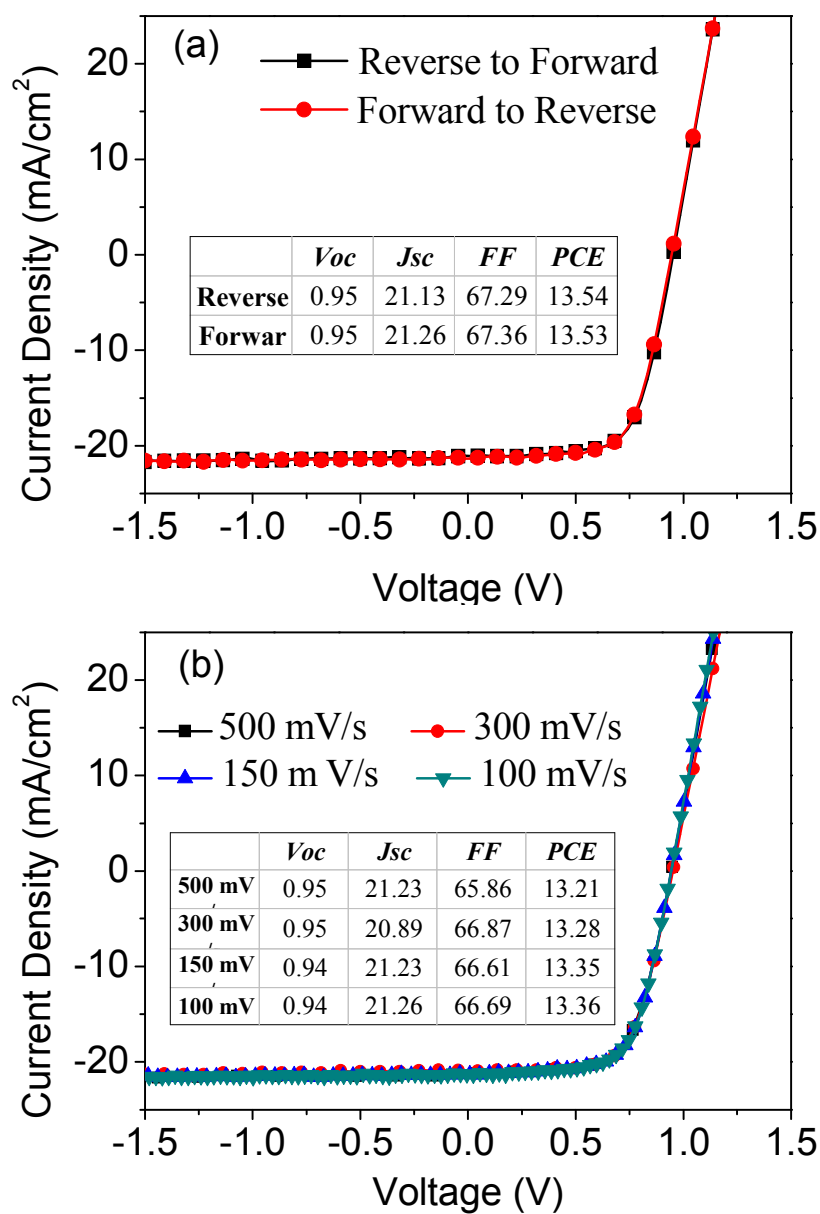

**Figure S3.** The  $J-V$  curves of PHJ-PSCs measured with (a) forward and reverse scanning directions and (b) different scanning speeds under AM 1.5 G illumination. The results suggest that almost no hysteresis was observed regardless of the scanning direction and scanning speed.
